# Supplementary figures and images for: Lupus or not? SLE Risk Probability Index (SLERPI): a simple, clinician-friendly machine learning-based model to assist the diagnosis of systemic lupus erythematosus
Source: HighWire-hosted journal article supplement (doi:10.1136/annrheumdis-2020-219069), 2021-02-10

A

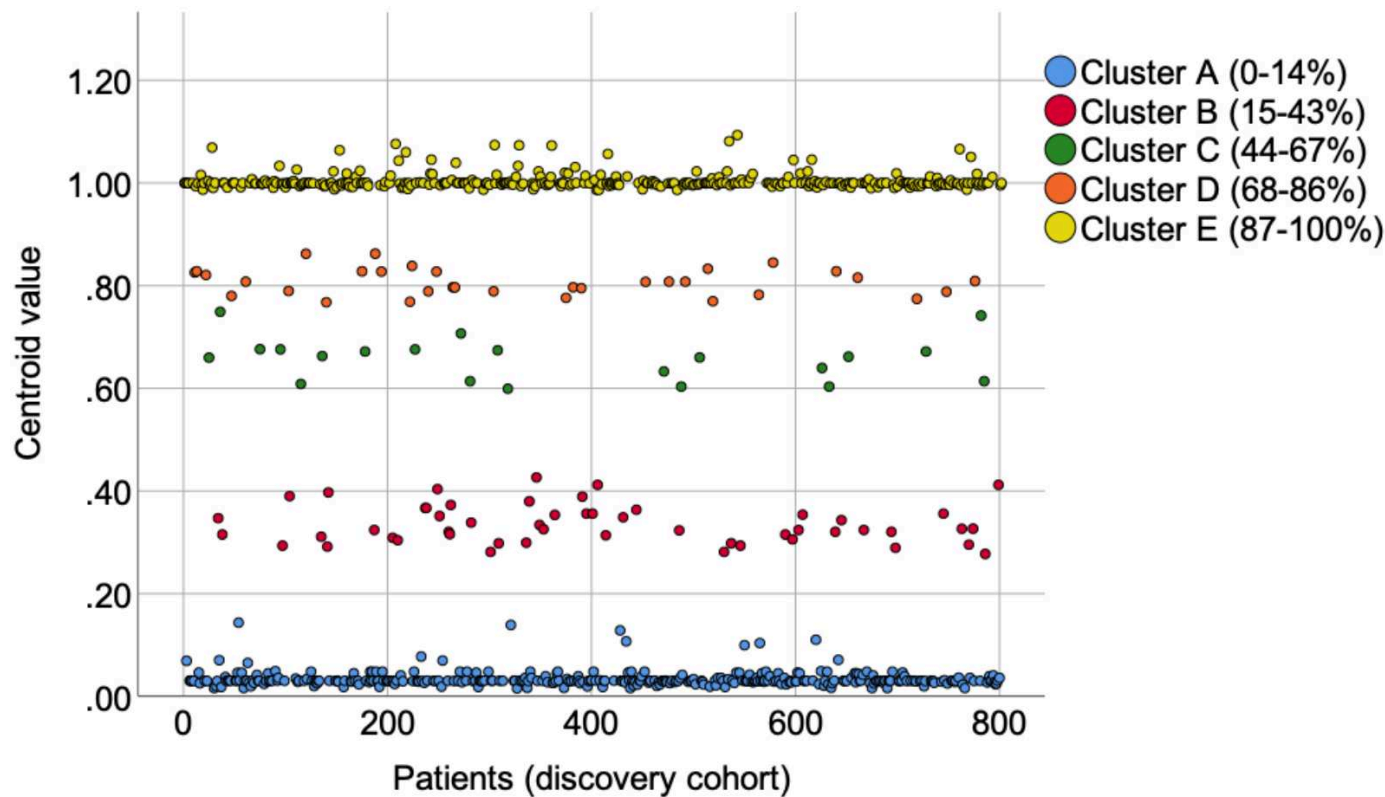

B

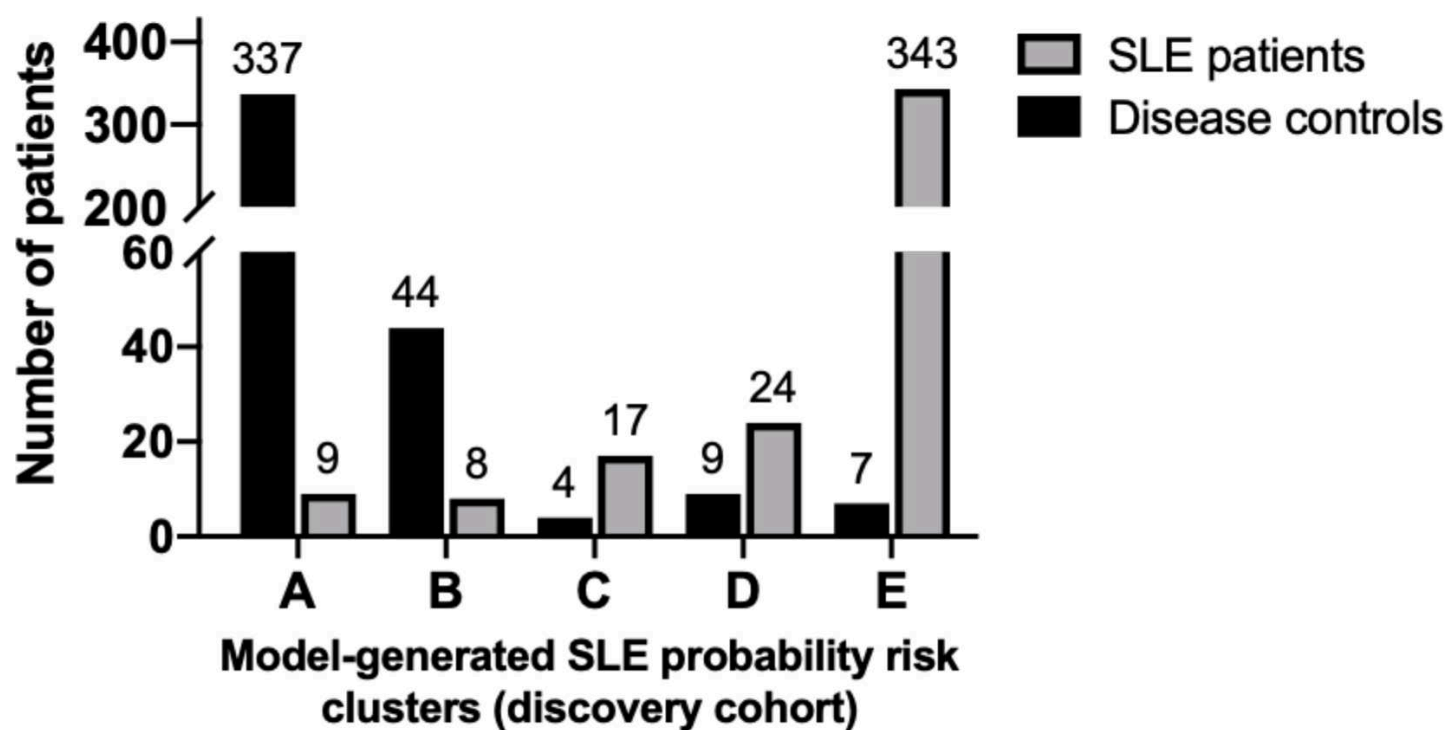

Supplement: annrheumdis-2020-219069supp006_data_supplement.pdf [file annrheumdis-2020-219069supp006_data_supplement.pdf]

A

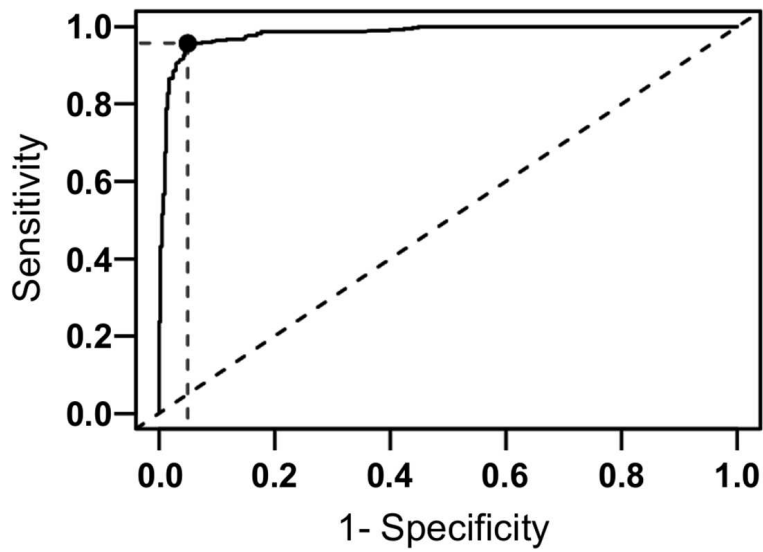

| Threshold                     | Youden's index |
|-------------------------------|----------------|
| $\geq 0.30$                   | 0.870324       |
| $\geq 0.40$                   | 0.897756       |
| <b><math>\geq 0.50</math></b> | 0.905237       |
| $\geq 0.60$                   | 0.892768       |
| $\geq 0.70$                   | 0.877805       |

B

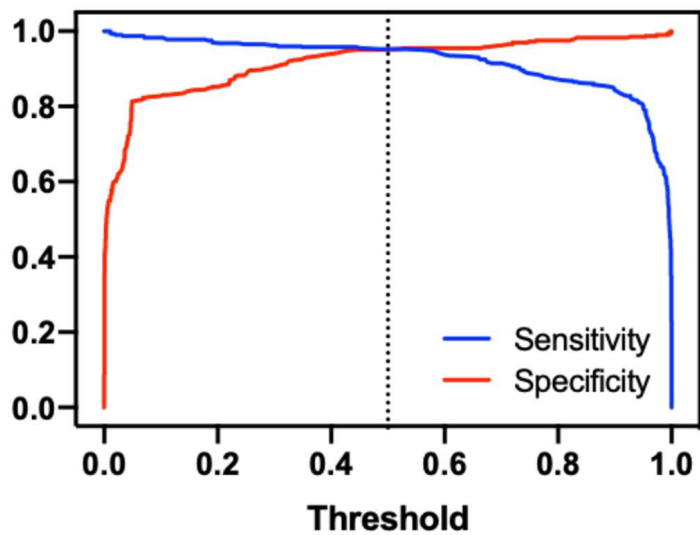

C

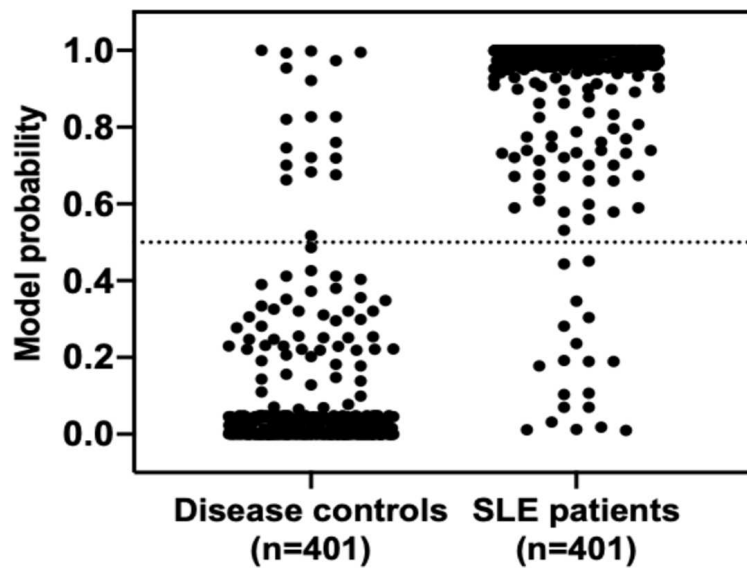

Supplement: annrheumdis-2020-219069supp008_data_supplement.pdf [file annrheumdis-2020-219069supp008_data_supplement.pdf]
